# Supplementary material for: Radiological Crossroads: Navigating the Intersection of Virtual Reality and Digital Radiology through a Comprehensive Narrative Review of Reviews
Source: MDPI journal article supplement (doi:10.3390/robotics13050069), 2024-04-30
Supplement: s1 [file s1]

Archive with 1 entries (1 files):
- robotics-2922008-supplementary.pdf
